# Supplementary material for: Nickel oxide nanoparticles modified with dimethylglyoxime grafted on a cellulose surface as an efficient adsorbent for thin film microextraction of tramadol in biological fluids followed by its determination using HPLC
Source: Royal Society of Chemistry journal article supplement (doi:10.1039/d4ay00784k), 2024-01-01
Supplement: d4ay00784k1.pdf [file d4ay00784k1.pdf]

## Supplementary Information

### **Nickel oxide nanoparticles modified with dimethylglyoxime grafted on cellulose surface as an efficient adsorbent for thin film microextraction of tramadol in biological fluids followed by its determination using HPLC**

*Zahra Ayazi<sup>a,b\*</sup>, Sahar Hobbivand<sup>a</sup>, Samira Pashayi Sarnaghi<sup>a</sup>*

*<sup>a</sup>Department of Chemistry, Faculty of Sciences, Azarbaijan Shahid Madani University, P.O. Box 53714-161 Tabriz, Iran*

*<sup>b</sup>Molecular Science and Engineering Research Group (MSERG), Azarbaijan Shahid Madani University, P.O. Box 53714-161 Tabriz, Iran.*

<sup>a,b</sup>Corresponding author Tel: +98 41 34327500; Fax: +98 41 34327541

E-mail address: ayazi@azaruniv.ac.ir

<http://orcid.org/0000-0001-6867-9505>

**Fig. S1.**

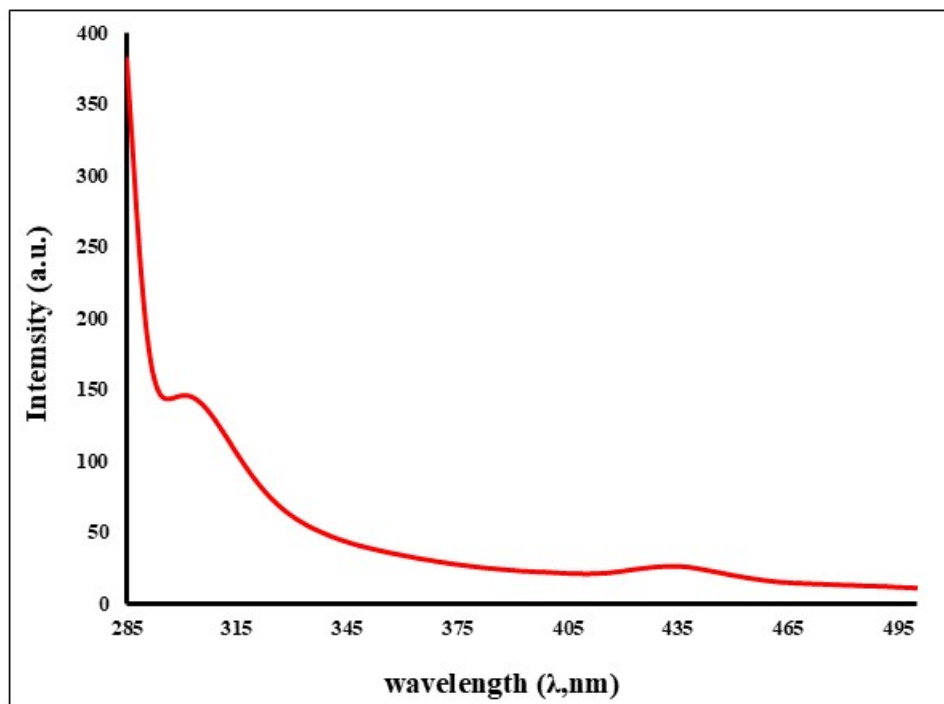

**Fig. S1.** Fluorescence spectrum of TRA using emission scan mode by employing the excitation wavelengths of 272 nm at medium intensity.

Fig. S2.

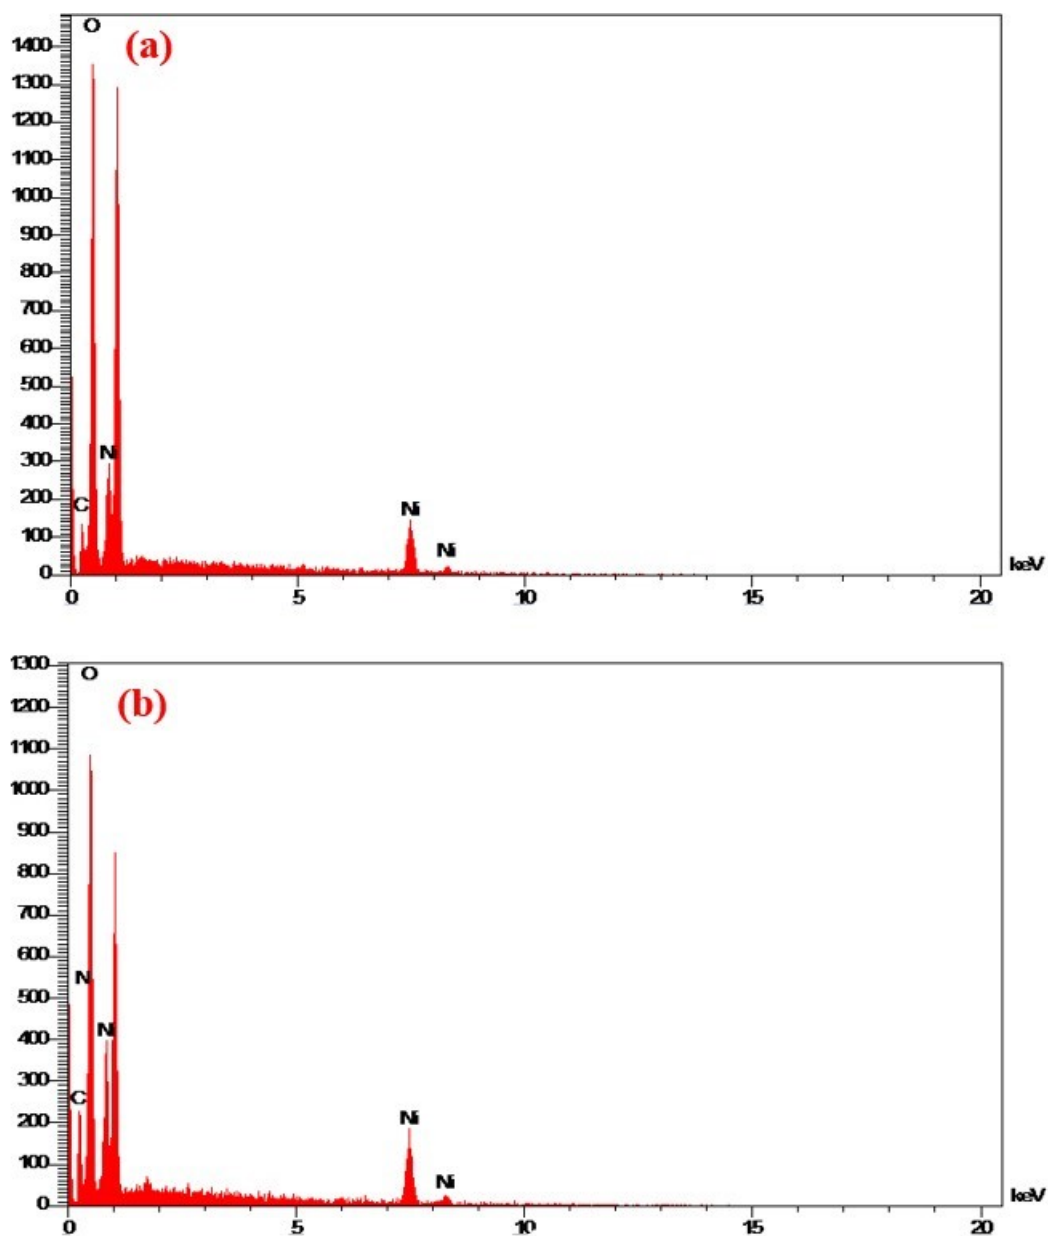

Fig. S2. The EDS spectra of (a) NiO-Cell thin film and (b) Ni(DMG)<sub>2</sub>-NiO-Cell based thin film.

Fig. S3.

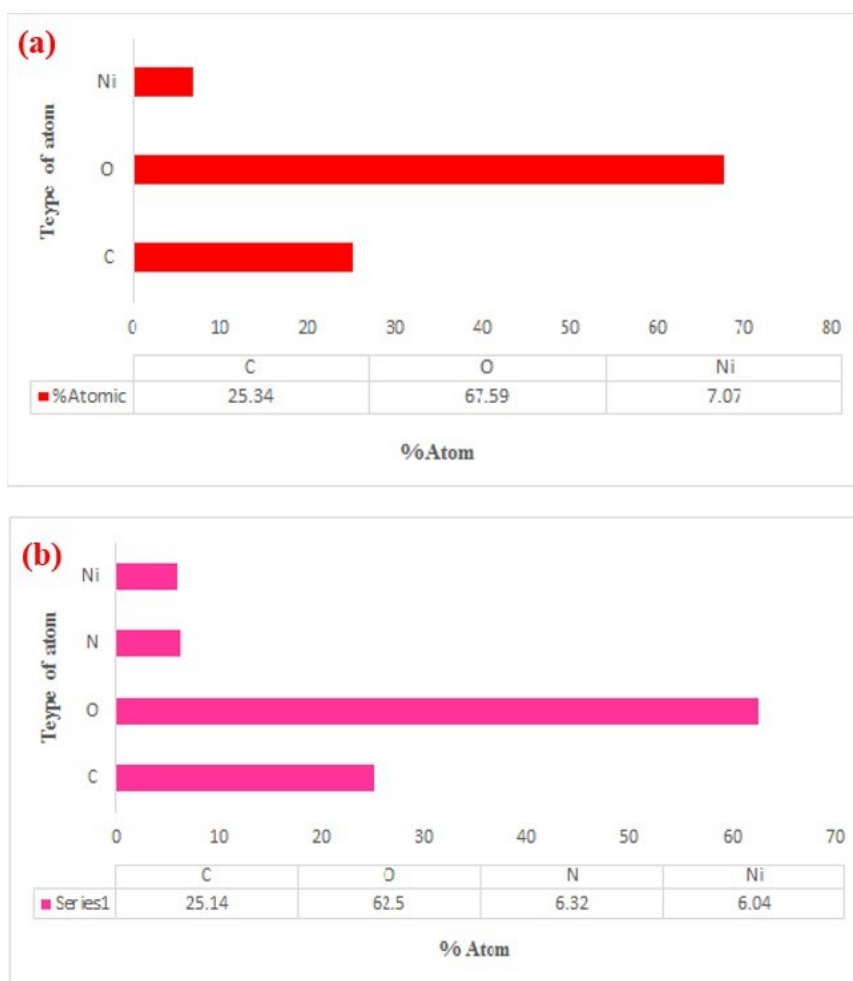

Fig. S3. The results of EDS analysis displaying the percentage of each atom present in the structure (a) NiO-Cell thin film and (b) Ni(DMG)<sub>2</sub>-NiO-Cell based thin film.

**Table S1.** The obtained RSD data for inter-day, intra-day, and inter- thin film repeatability and accuracy in concentration level of 1000 ng mL<sup>-1</sup>.

| No. sample | Inter-day              | Intra-day              | Inter-thin film        |
|------------|------------------------|------------------------|------------------------|
|            | Fluorescence intensity | Fluorescence intensity | Fluorescence intensity |
| 1          | 340.845                | 368.701                | 285.333                |
| 2          | 290.842                | 465.992                | 339.125                |
| 3          | 318.82                 | 396.424                | 335.254                |
| 4          | 298.253                | 431.004                | 321.341                |
| 5          | 294.2                  | 425.096                | 345.632                |
| 6          | 280.492                | 373.405                | 341.228                |
| RSD (%)    | 6.6                    | 8.3                    | 6.2                    |

**Table S2.** The obtained RSD data for inter-day, intra-day, and inter- thin film repeatability and accuracy in concentration level of 100 ng mL<sup>-1</sup>.

| No. experiment | Inter-day              | Intra-day              | Inter-thin film        |
|----------------|------------------------|------------------------|------------------------|
|                | Fluorescence intensity | Fluorescence intensity | Fluorescence intensity |
| 1              | 338.00                 | 368.70                 | 286.00                 |
| 2              | 291.84                 | 451.02                 | 341.63                 |
| 3              | 294.2                  | 395.42                 | 339.125                |
| 4              | 318.82                 | 425.09                 | 336.25                 |
| 5              | 297.26                 | 428.00                 | 340.23                 |
| 6              | 280.49                 | 374.00                 | 328                    |
| RSD (%)        | 6.3                    | 7.4                    | 5.9                    |
